# Supplementary material for: Fluorine-free synthesized tantalum carbide (Ta2C Mxene) as an efficient electrocatalyst for water reduction and nitro compound reduction
Source: Royal Society of Chemistry journal article supplement (doi:10.1039/d3ma00223c), 2023-01-01
Supplement: d3ma00223c1.pdf [file d3ma00223c1.pdf]

# **Fluorine-free synthesized Tantalum carbide (Ta<sub>2</sub>C Mxene) as an Efficient Electrocatalyst for Water Reduction and Nitro compound reduction**

Aathilingam Vijayprabhakaran<sup>a,b</sup>, Murugavel Kathiresan<sup>a,b\*</sup>

<sup>a</sup> Academy of Scientific and Innovative Research (AcSIR), Ghaziabad- 201002, India.

<sup>b</sup> Electro organic and Materials Electrochemistry Division, CSIR-CECRI, Karaikudi, 630003,  
Tamil Nadu, India, Email: [kathiresan@cecri.res.in](mailto:kathiresan@cecri.res.in)

## 1. Experimental parameters

### 1.1 Hydrogen Evolution Reaction study

The electrochemical investigations and CV studies were conducted in a standard three-electrode setup using Ag/AgCl (3M KCl) as the reference electrode (separated by a salt bridge), platinum sheet as the counter electrode, and modified glassy carbon as a working electrode. The studies were performed in an AUTOLAB Electrochemical workstation operated by Nova 2.1 software. The catalyst was made into a (5 mg in 1 mL) were dispersed into a solution containing ethanol: water in a ratio of (700 $\mu$ L:250 $\mu$ L) respectively. 50  $\mu$ L of Nafion binder was added to the mixture further to drop casting over glassy carbon (10  $\mu$ L) dry to overnight at room temperature. The hydrogen evolution reaction (HER) was investigated by linear sweep voltammetry at a scan rate of 2 mV/s in 0.5 M H<sub>2</sub>SO<sub>4</sub>. The reference electrode was calibrated versus the reversible hydrogen electrode using the following formula.

$$E_{\text{RHE}} = E_{\text{Ag/AgCl}} + E_{0 \text{ Ag/AgCl}} + 0.0591 * \text{pH}.$$

### 1.2 Electrochemical *p*-Nitrophenol reduction (galvanostatic electrolysis)

The preliminary electrochemical LSV studies were conducted same three-electrode setup using a modified glassy carbon electrode as a working electrode at a scan rate of 50 mV s<sup>-1</sup> in 1M KOH. The galvanostatic electrolysis was carried out on a two-compartment electrolysis cell separated by a Nafion-324 membrane at room temperature. At the end of electrolysis, the obtained residue was acidified with 1 N H<sub>2</sub>SO<sub>4</sub> until pH 6, and the organic products were extracted using ethyl acetate. The organic layer was then collected, washed with water, brine, and dried over anhydrous sodium sulfate, filtered, and evaporated. The desired product was confirmed by H<sup>1</sup> and C<sup>13</sup> NMR spectroscopy.

### 1.3 Nitro compounds reduction reaction

The reduction was carried out in the presence of NaBH<sub>4</sub> as a reducing agent, and all three aromatic nitro compounds (4-NP, DNP, and TNP) were reduced catalytically. To start the reduction process, at 1 mg of Ta<sub>2</sub>C nanoparticles were placed in a quartz cuvette containing 10 ml of 216  $\mu$ M 4-Nitrophenol (3 mg in 100 mL) similar to other nitro compounds (163  $\mu$ M, 131  $\mu$ M) and 240 mg of NaBH<sub>4</sub>. UV-visible spectroscopy was used to monitor the transformation of 4-nitrophenol (4-NP) into 4-aminophenol (4-AP) at room temperature.

## 2. Characterisation

### 2.1 EDAX spectrum

Commercial sample elemental composition: Ta<sub>2</sub>AlC (purity: 99.9%) MAX phase

Ta – 90.3%; Al – 6.7%; C – 2.9%; O – 0.03%; B – 0.02%; Sn – 0.01% and Fe – 0.03%

| Metals percentage           | Ta | Al | C   | O    | K   |
|-----------------------------|----|----|-----|------|-----|
| Ta <sub>2</sub> C-E (FESEM) | 71 | -  | 5.8 | 17.2 | 6   |
| Ta <sub>2</sub> C-E (SEM)   | 70 | -  | 6.5 | 16   | 7.5 |

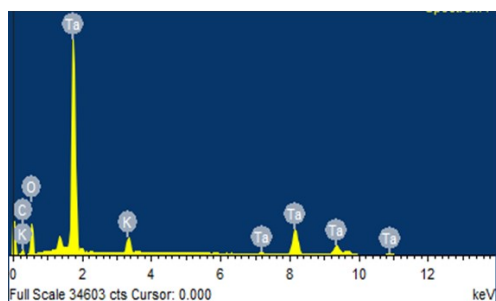

a) Ta<sub>2</sub>C-E MXene (FESEM)

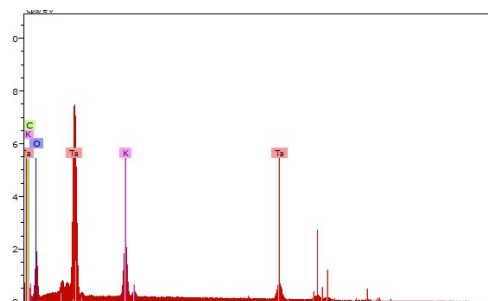

b) Ta<sub>2</sub>C-E MXene (SEM)

Figure S1. EDAX spectrum of a) Ta<sub>2</sub>C-E MXene (FESEM) and Ta<sub>2</sub>C-E MXene (SEM).

### 2.2 XPS spectrum

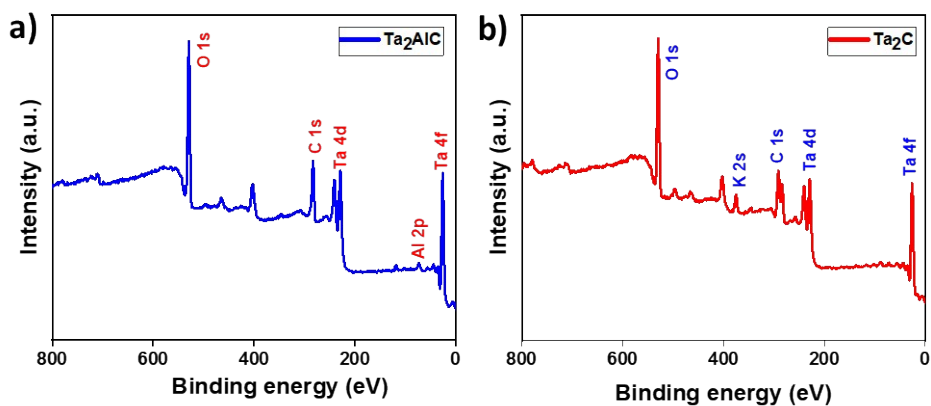

Figure S2 XPS survey spectrum of Ta<sub>2</sub>AlC and Ta<sub>2</sub>C-E.

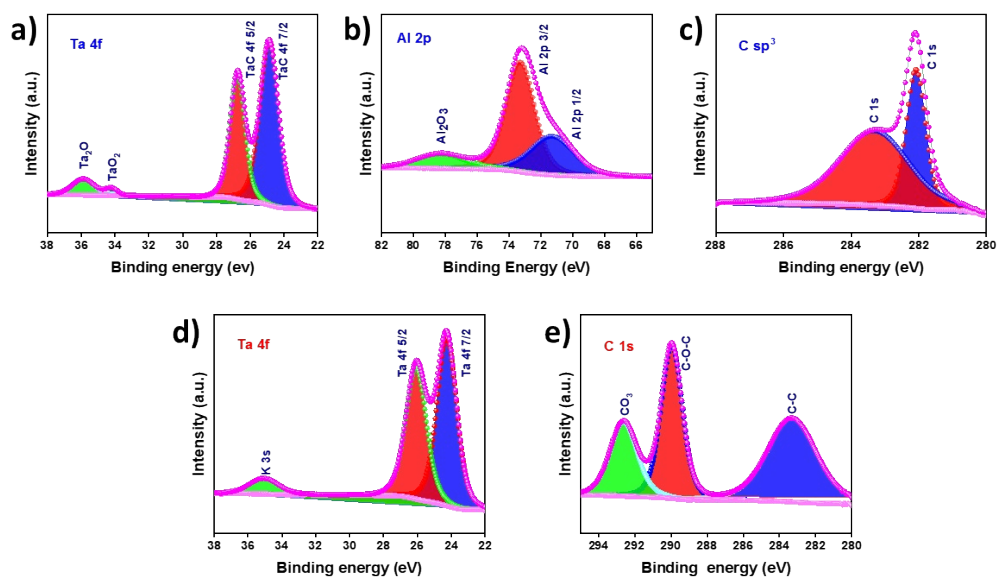

**Figure S3** Deconvoluted XPS spectrum of a) Ta 4f, b) Al 2p, c) C 1s of Ta<sub>2</sub>AlC and d) Ta 4f, and e) C 1s of Ta<sub>2</sub>C-E.

### 2.3 SEM images

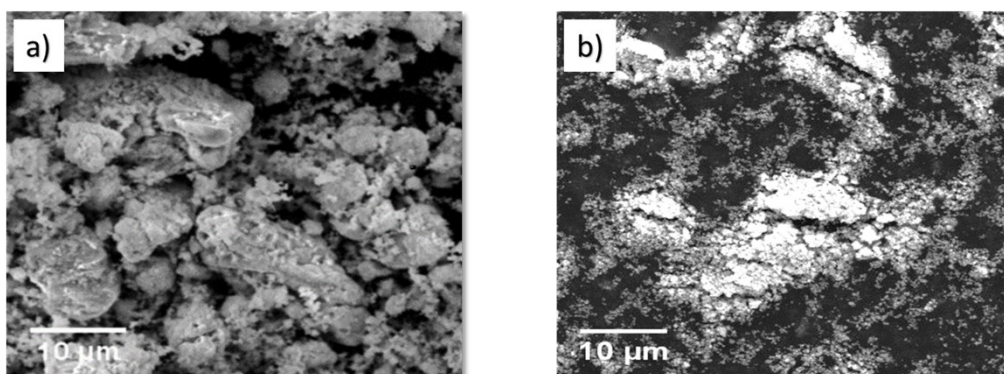

**Figure S4** SEM images of Ta<sub>2</sub>C-E before (a) and after (b) HER catalytic activity.

## 2.4 Electrochemical 4-NP reduction

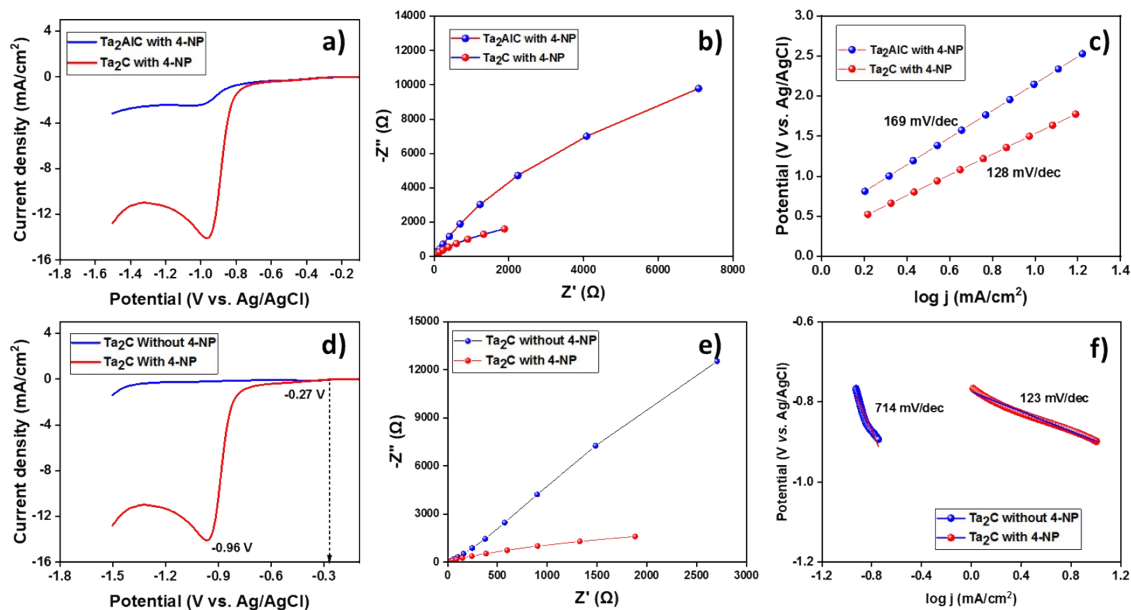

**Figure S5** a) LSV of Ta<sub>2</sub>C and MAX phase with 4-NP, b) corresponding EIS spectrum, and c) corresponding Tafel plot. d) LSV of Ta<sub>2</sub>C-E with and without 4-NP, e) corresponding EIS spectrum, and f) corresponding Tafel plot.

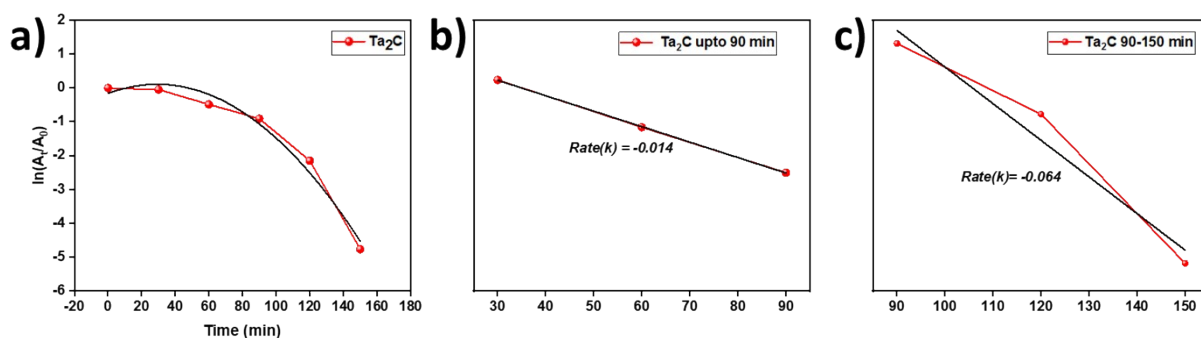

**Figure S6.** Plots of  $\ln(A_t/A_0)$  vs. time over samples at each 30 mins derived from Figure 8 d UV-vis absorption spectra revealing the reduction process

## 2.5 NMR spectrum

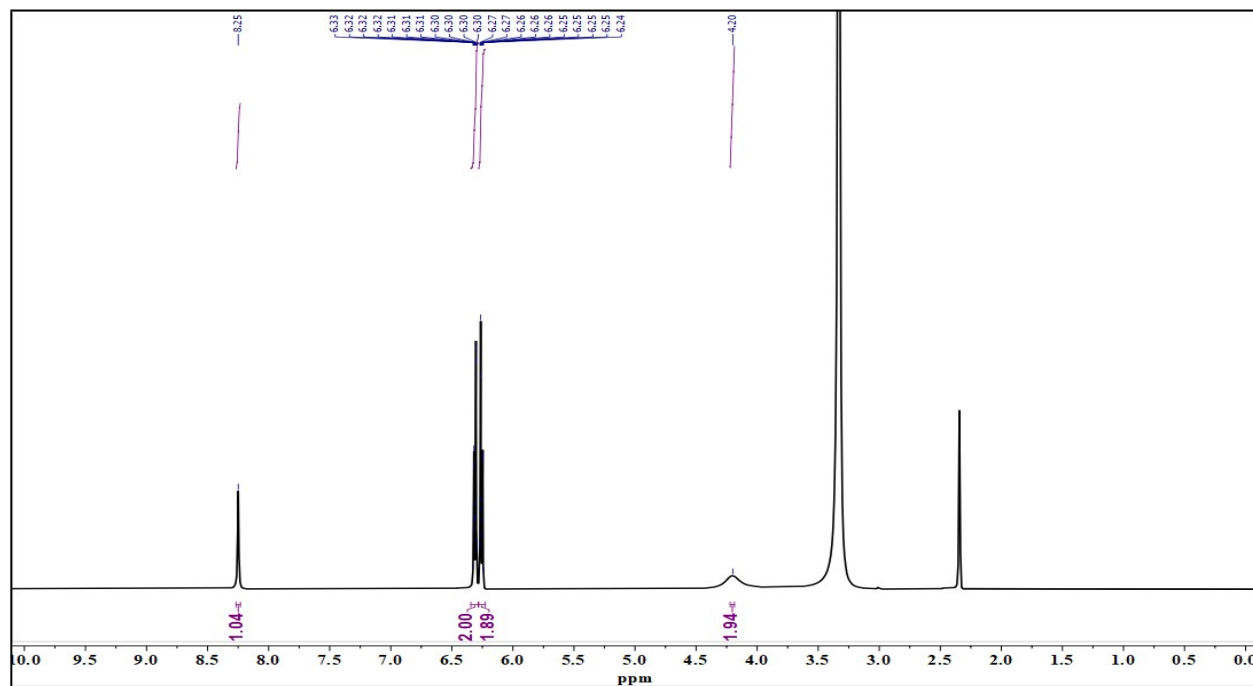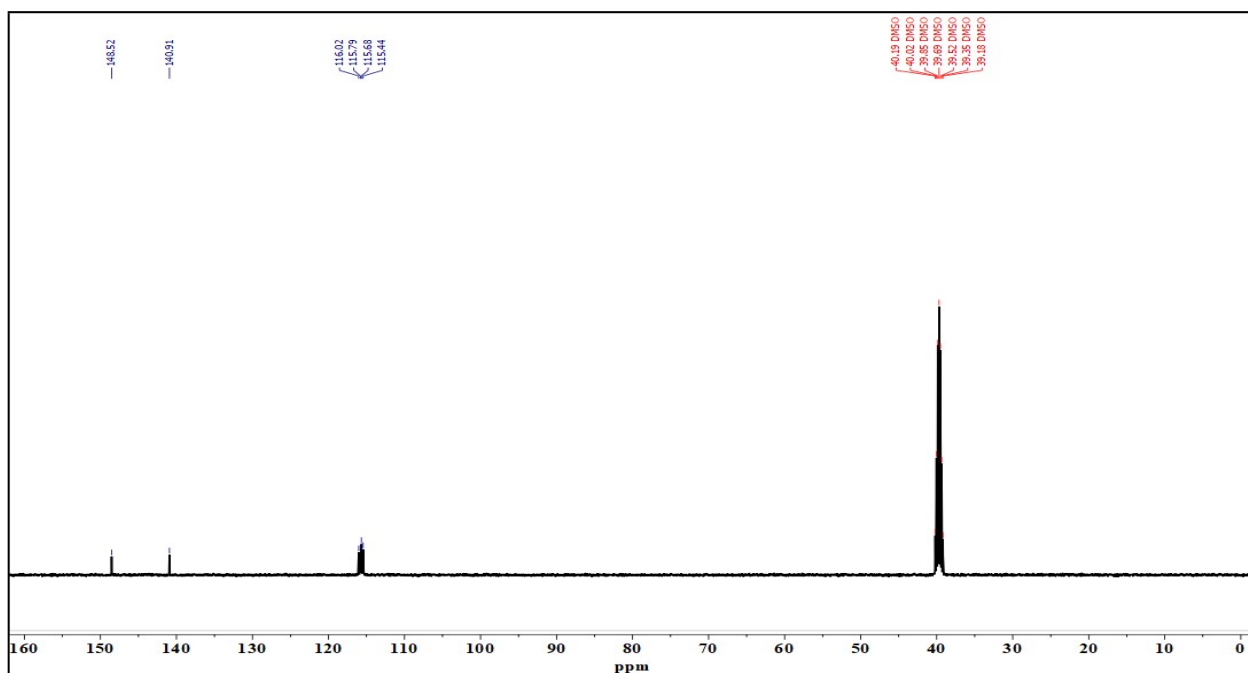

**Figure S7** a)  $\text{H}^1$  NMR spectrum of *p*-aminophenol and b)  $\text{C}^{13}$  NMR spectrum of *p*-aminophenol

$^1\text{H}$  NMR (500 MHz,  $\text{DMSO-}d_6$ )  $\delta$  8.25 (s, 1H), 6.34 – 6.28 (m, 2H), 6.28 – 6.23 (m, 2H), 4.20 (s, 2H).  $^{13}\text{C}$  NMR (126 MHz,  $\text{DMSO-}d_6$ )  $\delta$  148.52, 140.91, 116.02, 115.79, 115.68, 115.44, 40.19, 40.02, 39.85, 39.69, 39.52, 39.35, 39.18.

## 2.6 UV analysis studies

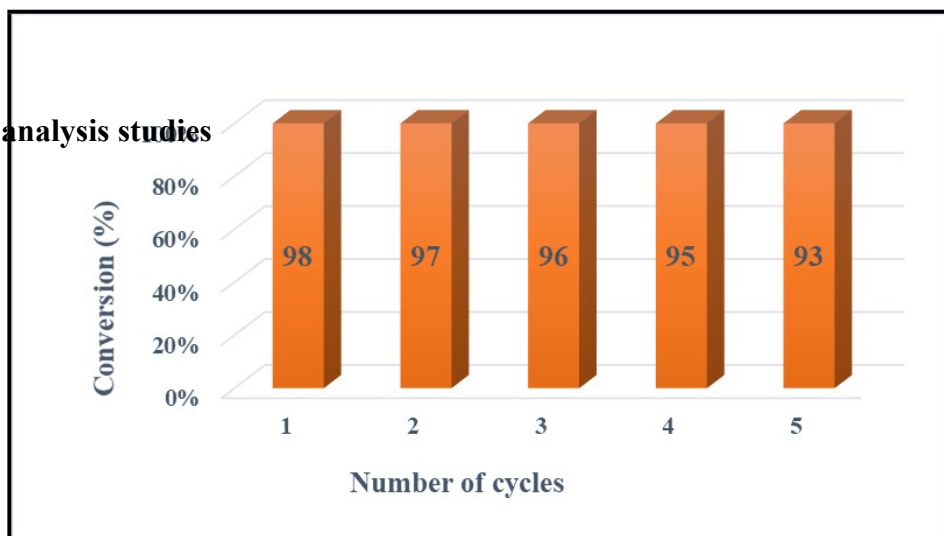

**Figure S8** UV-vis absorption results of the reduction process of 5 mL 4-nitrophenol (0.216

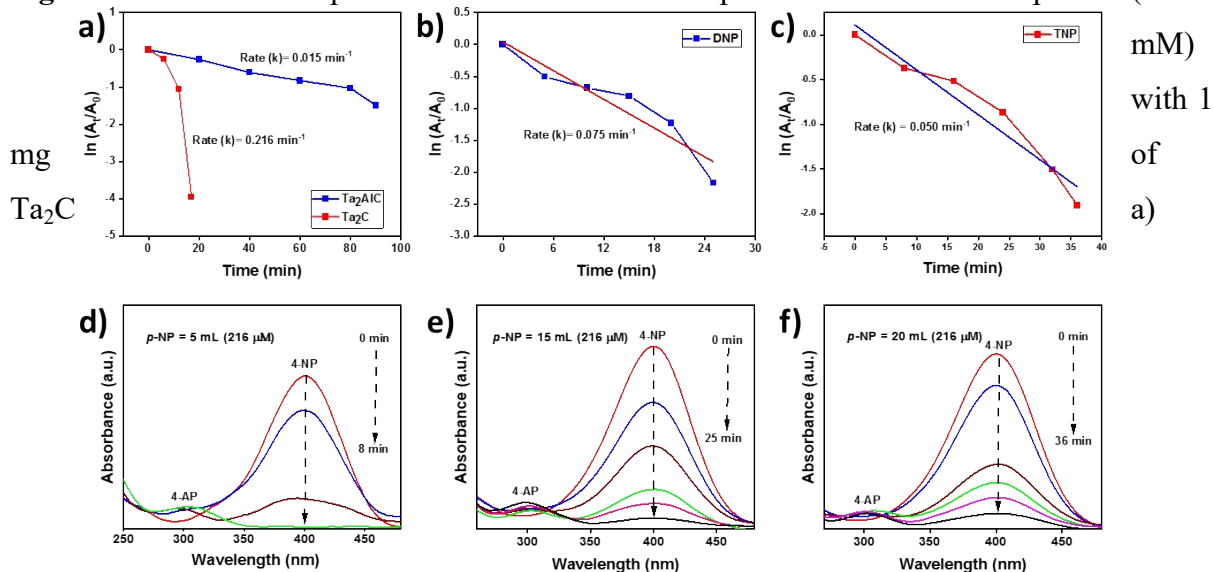

recyclability test for 5 consecutive cycles.

**Figure S9** UV-vis absorption spectra reduction with 1 mg of Ta<sub>2</sub>C. a-c) plot of ln(A<sub>t</sub>/A<sub>0</sub>) with Ta<sub>2</sub>AlC and Ta<sub>2</sub>C-E for the reduction of a) 4-NP, b) DNP, and c) TNP. d-f) UV-vis absorption spectra of the reduction process of d) 5 mL, e) 15 mL, and f) 20 mL of *p*-nitrophenol (216 mM) with 1 mg of Ta<sub>2</sub>C.

The kinetic equation for the reduction, which has the following textual form, can be used to determine the apparent rate constant.

$$\ln(C_t/C_0) \text{ or } \ln(A_t/A_0) = kt$$

Where A<sub>t</sub> = the absorbance of 4-NP at time t and A<sub>0</sub> = the absorbance of 4-NP at time 0.

The reduction reaction of 4-NP to 4-AP satisfies the pseudo-first-order kinetic equation. The rate constant (k) was determined from the linear plots of ln (A<sub>t</sub>/A<sub>0</sub>) versus reduction time in minutes.

Hence the reaction rate constant for 4-NP reduction was calculated from the plot of ln (A<sub>t</sub>/A<sub>0</sub>) Vs time and was found to be 21.6 x 10<sup>-2</sup> min<sup>-1</sup> which indicates faster kinetics than MAX phase (1.5 x 10<sup>-2</sup> min<sup>-1</sup>) shown in **Fig S8 (a)**. Table 1 shows a comparison of the catalytic performance of various 2D layered catalysts towards the reduction of 4-NP reduction. Further, Ta<sub>2</sub>C MXene was tested for its efficacy in converting other toxic pollutants (nitro compounds) such as 2,4-dinitrophenol and 2,4,6-trinitrophenol. The complete DNP reduction occur at 25 min further the kinetic rate constant DNP reduction with Ta<sub>2</sub>C was derived from plot 7.5 x 10<sup>-2</sup> min<sup>-1</sup> given in **Fig.S8 (b)** Similar that TNP complete reduction occur at 36 min further the kinetic rate constant derived from the similar way we observed 5.0 x 10<sup>-2</sup> min<sup>-1</sup> given in **Fig.S8 (c)**.<sup>1</sup>

**Table S1** Comparison of electro catalytic activity of HER recently reported MXene based catalyst.



| <b>Catalyst</b>                                                   | <b>Electrolyte medium</b>            | <b>Over potential (mV)</b> | <b>Tafel slope mV/dec</b> | <b>Reference</b> |
|-------------------------------------------------------------------|--------------------------------------|----------------------------|---------------------------|------------------|
| <b>Mo<sub>2</sub>CT<sub>x</sub>:Co</b>                            | 1 N H <sub>2</sub> SO <sub>4</sub>   | 250                        | -                         | 2                |
| <b>Mo<sub>2</sub>CT<sub>x</sub></b>                               | 0.5 M H <sub>2</sub> SO <sub>4</sub> | 305                        | 74                        | 3                |
| <b>Mo<sub>2</sub>TiAlC<sub>2</sub></b>                            | 0.5 M H <sub>2</sub> SO <sub>4</sub> | 570                        | 127                       | 4                |
| <b>N-Ti<sub>3</sub>C<sub>2</sub>T<sub>x</sub></b>                 | 0.5 M H <sub>2</sub> SO <sub>4</sub> | 198                        | 92                        | 5                |
| <b>NiFe<sub>2</sub>O<sub>4</sub>/Ti<sub>3</sub>C<sub>2</sub></b>  | 0.5 M KOH                            | 173                        | 112.2                     | 6                |
| <b>mNC-MoC/Ti<sub>3</sub>C<sub>2</sub></b>                        | 0.5 M H <sub>2</sub> SO <sub>4</sub> | 159                        | 70.9                      | 7                |
| <b>Mo<sub>2</sub>TiC<sub>2</sub>T<sub>x</sub>-Pt<sub>SA</sub></b> | 0.5 M H <sub>2</sub> SO <sub>4</sub> | 30                         | 30                        | 8                |
| <b>Ti<sub>3</sub>C<sub>2</sub> NFs</b>                            | 0.5 M                                | 169                        | 97                        | 9                |
| <b>Ti<sub>3</sub>C<sub>2</sub>T<sub>x</sub> flakes</b>            | H <sub>2</sub> SO <sub>4</sub>       | 385                        | 188                       |                  |
| <b>Ti<sub>3</sub>C<sub>2</sub>O<sub>x</sub></b>                   | 0.5 M                                | 190                        | 60.7                      | 10               |
| <b>Ti<sub>3</sub>C<sub>2</sub>(OH)<sub>x</sub></b>                | H <sub>2</sub> SO <sub>4</sub>       | 217                        | 88.5                      |                  |
| <b>Ti<sub>3</sub>C<sub>2</sub>T<sub>x</sub>-450</b>               |                                      | 266                        | 109.8                     |                  |
| <b>Ta<sub>2</sub>CS<sub>2</sub>-E</b>                             | 1 M                                  | 74                         | 66.9                      | 11               |
| <b>Ta<sub>2</sub>CS<sub>2</sub></b>                               | KOH                                  | 105                        | 73.7                      |                  |
| <b>Ta<sub>4</sub>C<sub>3</sub>T<sub>x</sub></b>                   |                                      | 139                        | 122.9                     |                  |
| <b>Ta<sub>2</sub>C-E</b>                                          | 0.5 M H <sub>2</sub> SO <sub>4</sub> | 223                        | 75                        | This work        |

## Reference

1. Y. Chen, C. Yang, X. Huang, L. Li, N. Yu, H. Xie, Z. Zhu, Y. Yuan and L. Zhou, *RSC Adv.*, 2022, **12**, 4836-4842.
2. D. A. Kuznetsov, Z. Chen, P. V. Kumar, A. Tsoukalou, A. Kierzkowska, P. M. Abdala, O. V. Safonova, A. Fedorov and C. R. Müller, *J. Am. Chem. Soc.*, 2019, **141**, 17809-17816.
3. Z. W. Seh, K. D. Fredrickson, B. Anasori, J. Kibsgaard, A. L. Strickler, M. R. Lukatskaya, Y. Gogotsi, T. F. Jaramillo and A. Vojvodic, *ACS Energy Lett.*, 2016, **1**, 589-594.
4. K. P. Akshay Kumar, O. Alduhaish and M. Pumera, *Electrochem. Commun.*, 2021, **125**, 106977.
5. T. A. Le, Q. V. Bui, N. Q. Tran, Y. Cho, Y. Hong, Y. Kawazoe and H. Lee, *ACS Sustainable Chem. Eng.*, 2019, **7**, 16879-16888.
6. P. V. Shinde, P. Mane, B. Chakraborty and C. Sekhar Rout, *J. Colloid Interface Sci.*, 2021, **602**, 232-241.
7. Y. Tang, C. Yang, Y. Xie, Y. Kang, W. Que, J. Henzie and Y. Yamauchi, *ACS Sustainable Chem. Eng.*, 2023, **11**, 168-176.
8. J. Zhang, Y. Zhao, X. Guo, C. Chen, C.-L. Dong, R.-S. Liu, C.-P. Han, Y. Li, Y. Gogotsi and G. Wang, *Nat. Catal.*, 2018, **1**, 985-992.
9. W. Yuan, L. Cheng, Y. An, H. Wu, N. Yao, X. Fan and X. Guo, *ACS Sustainable Chem. Eng.*, 2018, **6**, 8976-8982.
10. Y. Jiang, T. Sun, X. Xie, W. Jiang, J. Li, B. Tian and C. Su, *ChemSusChem*, 2019, **12**, 1368-1373.
11. T. Wu, X. Pang, S. Zhao, S. Xu, Z. Liu, Y. Li and F. Huang, *Small Struct.*, 2022, **3**, 2100206.
